# Supplementary material for: Transilient Response to Acetone Gas Using the Interlocking p+n Field-Effect Transistor Circuit
Source: MDPI journal article supplement (doi:10.3390/s18061914), 2018-06-12
Supplement: s1 [file s1]

Article

# Supplementary Materials: Transilient Response to Acetone Gas using the Interlocking p+n Field-effect Transistor Circuit

Xinyuan Zhou<sup>1,2,3</sup>, Jinxiao Wang<sup>4</sup>, Zhou Wang<sup>1</sup>, Yuzhi Bian<sup>1,2</sup>, Ying Wang<sup>1</sup>, Ning Han<sup>1,3,\*</sup> and Yunfa Chen<sup>1,3,\*</sup>

<sup>1</sup> State Key Laboratory of Multiphase Complex Systems, Institute of Process Engineering, Chinese Academy of Sciences, Beijing 100190, China

<sup>2</sup> University of Chinese Academy of Sciences, No. 19A Yuquan Road, Beijing 100049, China  
zhouxinyuan14@mailsucas.edu.cn

<sup>3</sup> Center for Excellence in Regional Atmospheric Environment, Institute of Urban Environment, Chinese Academy of Sciences, Xiamen 361021, China

<sup>4</sup> College of Materials Science and Engineering, Xi'an Jiaotong University, Xi'an 710049, China

\* Correspondence: nhan@ipe.ac.cn; chenyf@ipe.ac.cn; Tel.: +86-010-6255-8356

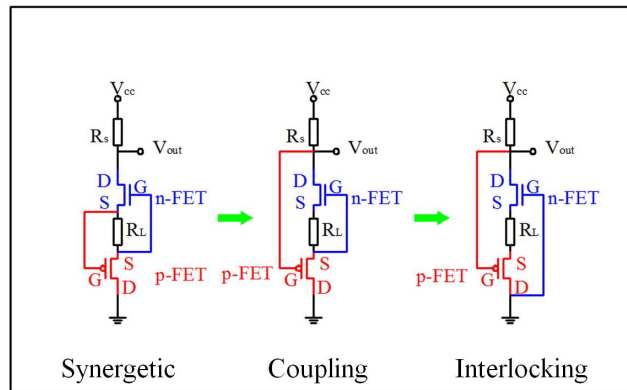

Figure S1. The difference among the synergetic, coupling and interlocking p+n FET circuit for MOX acetone sensor.

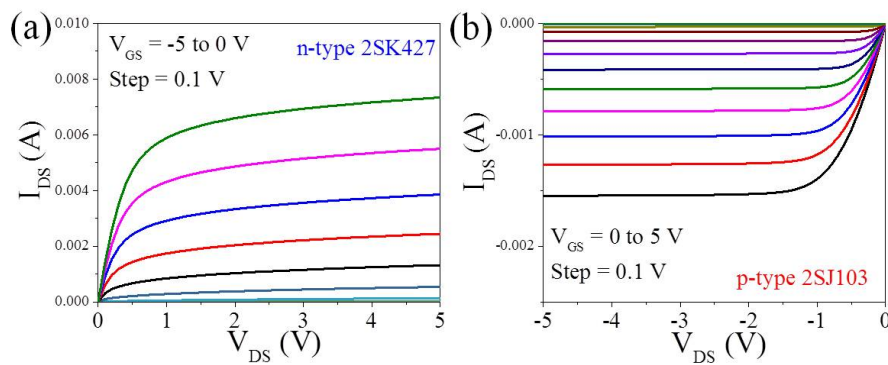

Figure S2. (a)  $V_{DS}$ - $I_{DS}$  curves of FET 2SK427,  $V_{GS}$  changes from -5 V to 0 V (step is 0.1 V). (b)  $V_{DS}$ - $I_{DS}$  curves of FET 2SJ103,  $V_{GS}$  changes from 0 V to 5 V (step is 0.1 V).

$$V_{GS(n)} = V_{DS(p)} \dots\dots\dots (7)$$

$$V_{GS(p)} = V_{DS(n)} \dots\dots\dots (8)$$

$$V_{GS(n)} = -1.3V \quad (V_{T(n)} = -0.6V)$$

$$V_{GS(p)} = 3.7V \quad (V_{T(p)} = 1.2V)$$

$$I_{min} = 1.65 \times 10^{-4} \mu A$$

$$V_{OUT} = IR_L - V_{DS(p)} + V_{DS(n)} = 5V$$

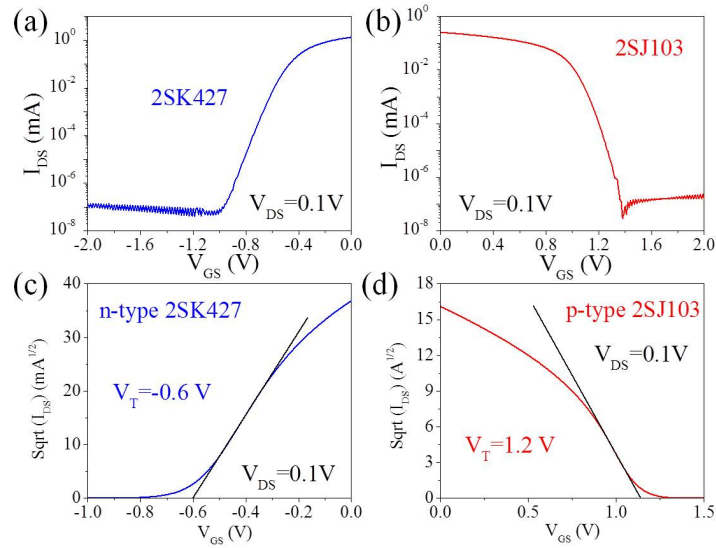

25 **Figure S3.**  $I_{DS}$ - $V_{GS}$  curves of FETs 2SK427 (a) and 2SJ103 (b). (c) (d) the calculation of  $V_T$ .

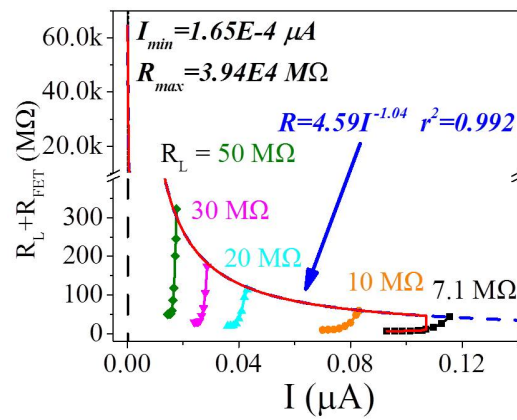

26  
27 **Figure S4.** The approximate curve of interlocking p+n FET circuit with  $R_L$  of 7.1 MΩ (red solid  
28 curve). The blue dash curve is the fitting curve of the maximum points from five solid curves of  
29 n-type FET 2SK427 circuit with  $R_L$  7.1, 10, 20, 30 and 50 MΩ respectively. The fitting curve  
30 formula is  $R = 4.59 I^{-1.04}$  ( $r^2 = 0.992$ ).

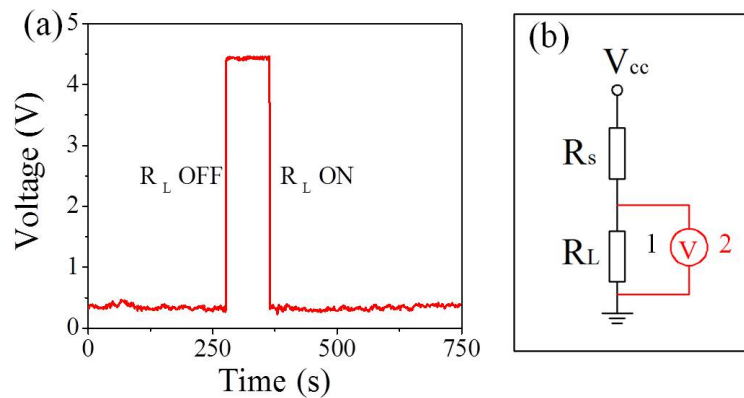

31 **Figure S5.** (a) Output voltage of Mn doped ZnO (MZO) in the traditional electric circuit and the  
32 interlocking p+n FET circuit with  $R_L$  ON or OFF. (b) Circuit schematic of the static gas sensing test  
33 system.

34 When  $R_L$  is connected, the circuit 1 is closed. When  $R_L$  is cut off, the circuit 1 is open, but the circuit 2 is  
35 closed and  $R_v$  is calculated to be  $\sim 800\text{ M}\Omega$ .
